# Supplementary material
Source: ML conference proceedings conference paper supplement (https://proceedings.neurips.cc/paper_files/paper/2015/hash/4462bf0ddbe0d0da40e1e828ebebeb11-Abstract.html)
Supplement: Supplementary file [file 4462bf0ddbe0d0da40e1e828ebebeb11-Supplemental.zip]

---

## Supplementary Material: The Human Kernel

---

**Andrew Gordon Wilson**  
CMU

**Christoph Dann**  
CMU

**Christopher G. Lucas**  
University of Edinburgh

**Eric P. Xing**  
CMU

Supplementary materials are available at <http://www.cs.cmu.edu/~andrewgw/humansupp.pdf>, providing a brief review of Gaussian processes, and additional experiments regarding the under-fitting property of GP maximum marginal likelihood estimation of kernel length-scales. We also provide the instructions and some of the questions asked in the human experiments. To participate in the exact experiments, and additional resources, see <http://www.functionlearning.com>.
